# Supplementary material for: Providing Biological Plausibility for Exposure–Health Relationships for the Mycotoxins Deoxynivalenol (DON) and Fumonisin B1 (FB1) in Humans Using the AOP Framework
Source: MDPI journal article supplement (doi:10.3390/toxins14040279), 2022-04-13
Supplement: s1 [file s1]

## Article

# Providing Biological Plausibility for Exposure–Health Relationships for the Mycotoxins Deoxynivalenol (DON) and Fumonisin B1 (FB1) in Humans Using the AOP Framework

Annick D. van den Brand Lola Bajard, Inger-Lise Steffensen, Anne Lise Brantsæter, Hubert A.A.M. Dirven, Jochem Louisse, Ad Peijnenburg, Sophie Ndaw, Alberto Mantovani, Barbara De Santis and Marcel J.B. Mengelers

## Supplementary data

### A – Overview and appraisal of occupational HBM studies

Table S1. Occupational HBM studies on DON exposure and LaKind appraisal score

| Study                            | Occupational setting/number of workers and controls                                    | Analytical method/Biomarkers                   |                                                                                                                                     |                                                                       | Results<br>Creatinine-adjusted /non-adjusted urinary DON concentration (µg/g creatinine/µg/L) <sup>a</sup>                                                                                                                      | Main conclusions on exposure                                                                                      | Additional information                                                                                                                 | LaKind scoring <sup>a</sup> |
|----------------------------------|----------------------------------------------------------------------------------------|------------------------------------------------|-------------------------------------------------------------------------------------------------------------------------------------|-----------------------------------------------------------------------|---------------------------------------------------------------------------------------------------------------------------------------------------------------------------------------------------------------------------------|-------------------------------------------------------------------------------------------------------------------|----------------------------------------------------------------------------------------------------------------------------------------|-----------------------------|
|                                  |                                                                                        | Substances studied                             | Biomarker of exposure /Matrix/ Sampling time                                                                                        | Method LOD – LOQ (µg/L)                                               |                                                                                                                                                                                                                                 |                                                                                                                   |                                                                                                                                        |                             |
| Follmann et al., 2016 (German y) | Mill workers (n=17, male n=12)<br>Control group (n=13), employees from another company | DON<br>Citrinin<br>Ochratoxin A<br>Zearalenone | DON, DOM-1 <sup>1</sup><br>OTA, OTα<br>CIT, DH-CIT <sup>2</sup><br>ZEN, αZEL, βZEL <sup>3</sup><br>/urine/ random during work shift | LC-MS/MS<br>LOD/LOQ<br>DON<br>0.15/0.3<br>LOD/LOQ<br>DOM-1<br>0.1/0.2 | DON - 100 % positive samples<br>Male workers<br>Median (µg/L): 5.4 (range 1.27 – 113.8)<br>Median (µg/g): 4.8 (range 1.5 – 12.0)<br>Controls<br>Median (µg/L): 6.8 (range 1.01 – 14.6)<br>Median (µg/g): 5.7 (range 1.1 – 13.4) | No significant differences for DON between male workers and controls<br>Range of DOM-1 similar in the two cohorts | Other mycotoxins detected<br>Workers, >LOD<br>OTA, 100%<br>OTα, 33%<br>CIT, 100%<br>DH-CIT, 100%<br>ZEN, 100%<br>αZEL, 33%<br>βZEL 17% | 14                          |
|                                  |                                                                                        |                                                |                                                                                                                                     |                                                                       | DOM-1<br>Male workers – 54 % positive samples<br>Median (µg/L): 0.114 (range LOD – 0.216)<br>Median (µg/g): 0.07 (range LOD – 0.3)<br>Controls                                                                                  |                                                                                                                   |                                                                                                                                        |                             |
|                                  |                                                                                        |                                                |                                                                                                                                     |                                                                       |                                                                                                                                                                                                                                 |                                                                                                                   |                                                                                                                                        |                             |
|                                  |                                                                                        |                                                |                                                                                                                                     |                                                                       |                                                                                                                                                                                                                                 |                                                                                                                   |                                                                                                                                        |                             |

|                                    |                                                                                                     |                                                                                                                                                                              |                                                                                                                                                                                                                                                                                                                                                                               |                                                                                |                                                                                                                                                                                                                                                                       |                                                                                                                                                                          |                                                                                                                                                                                                                                  |    |
|------------------------------------|-----------------------------------------------------------------------------------------------------|------------------------------------------------------------------------------------------------------------------------------------------------------------------------------|-------------------------------------------------------------------------------------------------------------------------------------------------------------------------------------------------------------------------------------------------------------------------------------------------------------------------------------------------------------------------------|--------------------------------------------------------------------------------|-----------------------------------------------------------------------------------------------------------------------------------------------------------------------------------------------------------------------------------------------------------------------|--------------------------------------------------------------------------------------------------------------------------------------------------------------------------|----------------------------------------------------------------------------------------------------------------------------------------------------------------------------------------------------------------------------------|----|
|                                    |                                                                                                     |                                                                                                                                                                              |                                                                                                                                                                                                                                                                                                                                                                               |                                                                                | Median ( $\mu\text{g/L}$ ):<br>0.05 (range LOD – 0.18)<br><br>Median ( $\mu\text{g/g}$ ):<br>0.05 (range LOD – 0.17)                                                                                                                                                  |                                                                                                                                                                          |                                                                                                                                                                                                                                  |    |
| Viegas et al., 2018<br>(Portugal ) | Workers from fresh dough company (n=21)<br><br>Control group (n=19), employees from another company | DON<br>Aflatoxin B1/2, G1/2<br>Aflatoxin M1 Alternariol<br>Ochratoxin A Citrinin<br>T-2 toxin HT-2 toxin<br>Fumonisin B1/2 Zearalenone<br>Enniatins A/A1/B/B1<br>Beauvericin | <b>DON</b><br><b>DON-3-GlcA</b><br><br>AFB1/2, AFG1/2 AFM1<br>Alternariol metabolites <sup>4</sup><br>OTA metabolites <sup>5</sup><br>CIT, DH-CIT T-2<br>HT-2, HT-2-4GlcA <sup>6</sup><br>FB1, FB2<br>ZEN, $\alpha$ ZEL, $\beta$ ZEL <sup>3</sup> , ZAN, ZEN-14-GlcA <sup>7</sup><br>EnA/A1/B/B1 Beauvericin<br><br>urine/ random, during work shift between 11 a.m and 4 p.m | LC-MS/MS<br><br>LOD/LOQ<br>DON 0.5/2<br><br>LOD/LOQ<br>DON-3-GlcA<br>1.24/4.14 | <b>DON-3-GlcA</b><br>Workers<br>95 % samples >LOD<br>14 % samples >LOQ (n=3)<br>Range: 12.6 – 64.5 $\mu\text{g/g}$<br>Mean: 34.87 $\mu\text{g/g}$ , SD 17.45 $\mu\text{g/g}$<br><br>Controls<br>58 % samples >LOD<br>0 % samples >LOQ<br><br><b>DON:</b> not detected | DON-GlcA was the most prominent biomarkers found in both groups (based on the number of samples >LOD)<br><br>DON-GlcA was at the highest levels in samples from workers  | Other mycotoxins detected<br>Workers, >LOD<br>AFM1, 14%<br>EnB, 14%<br>CIT, 29%<br>DH-CIT, 14%<br>OTA, 48%<br>2'R-OTA, 10%<br><br>Controls, >L OD<br>AFM1, 5%<br>EnB, 11%<br>CIT, 58%<br>DH-CIT, 11%<br>OTA, 68%<br>2'R-OTA, 21% | 16 |
| Viegas et al., 2019<br>(Portugal ) | Swine production Workers (n=25)<br><br>Control group (n=19), employees from another company         | DON<br>Aflatoxin M1 Citrinin<br>Ochratoxin A                                                                                                                                 | <b>DON-3-GlcA</b><br><br>AFM1<br>OTA<br>CIT, DH-CIT<br><br>urine/ during work shift between 11 a.m and 1 p.m                                                                                                                                                                                                                                                                  | LC-MS/MS<br><br>LOD/LOQ<br>DON-3-GlcA<br>1.24/4.14                             | <b>DON-3-GlcA</b><br>Workers<br>60 % samples >LOD<br>52 % samples >LOQ (n=13)<br>Range: 22 – 71.1 $\mu\text{g/L}$<br>Median: 32.8 $\mu\text{g/L}$<br><br>Controls<br>58 % samples >LOD<br>0 % samples >LOQ                                                            | DON-GlcA was one of the most prevalent biomarkers found in the worker group (based on the number of samples >LOD). Only workers presented quantifiable level of DON-GlcA | Mycotoxins detected<br>Workers, >LOD<br>AFM1, 16%<br>EnB, 4%<br>CIT, 8%<br>DH-CIT, 12%<br>OTA, 88%<br><br>Controls, >LOD<br>AFM1, 5%<br>EnB, 11%<br>CIT, 58%<br>DH-CIT, 11%<br>OTA, 68%<br>2'R-OTA, 21%                          | 15 |
| Ndaw et al., 2021a<br>(France)     | Grain elevator Workers (n=3)                                                                        | DON<br>Aflatoxin B1<br>Ochratoxin A<br>T-2 toxin<br>HT-2 toxin                                                                                                               | <b>DON</b><br>AFB1<br>AFM1<br>OTA , OT $\alpha$                                                                                                                                                                                                                                                                                                                               | HR-MS/MS<br><br>LOQ<br>DON 0.05                                                | <b>DON</b><br>100% samples >LOQ (n=9)                                                                                                                                                                                                                                 | DON was one of the most prevalent biomarkers. The low number of                                                                                                          | Mycotoxins detected<br>Samples >LOQ<br>AFB1, 55%                                                                                                                                                                                 | 13 |

|                                      |                                     |                                                                                               |                                                                                                                                    |                                     |                                                                                                                                                                                                                                                             |                                                                                                                                                                                                                                                                                                          |                                                                                                                                   |
|--------------------------------------|-------------------------------------|-----------------------------------------------------------------------------------------------|------------------------------------------------------------------------------------------------------------------------------------|-------------------------------------|-------------------------------------------------------------------------------------------------------------------------------------------------------------------------------------------------------------------------------------------------------------|----------------------------------------------------------------------------------------------------------------------------------------------------------------------------------------------------------------------------------------------------------------------------------------------------------|-----------------------------------------------------------------------------------------------------------------------------------|
|                                      |                                     | Fumonisin B1<br>Zearalenone                                                                   | T-2<br>HT-2<br>FB1<br>ZEN, $\alpha$ ZEL, $\beta$ ZEL,<br><br>urine/ pre-<br>shift, post-shift<br>and first morning<br>void samples |                                     | Range: 3.9 – 18.8<br>$\mu$ g/L (2.75– 21.4<br>$\mu$ g/g)<br>Median: 14.4 $\mu$ g/L<br>(12.1 $\mu$ g/g)                                                                                                                                                      | workers include<br>d and the lack of<br>a control group<br>do not enable to<br>draw any<br>conclusions<br>on the<br>magnitude of the<br>occupational<br>exposure.                                                                                                                                        | AFM1, 44%<br>OTA, 100%<br>ZEN, 66%<br>$\alpha$ ZEL, 22%                                                                           |
|                                      |                                     |                                                                                               | DON                                                                                                                                |                                     |                                                                                                                                                                                                                                                             | DON was one of<br>the most<br>prevalent<br>biomarkers.<br>Concentrations<br>of DON were<br>higher than<br>previously<br>reported<br>concentrations<br>from the general<br>population.<br>Concentrations<br>of DON<br>appeared to be<br>higher in post-<br>shift samples<br>than in pre-shift<br>samples. |                                                                                                                                   |
|                                      |                                     |                                                                                               | AFB1<br>AFM1<br>OTA , OT $\alpha$<br>T-2<br>HT-2<br>FB1<br>ZEN, $\alpha$ ZEL, $\beta$ ZEL,                                         |                                     | 98% samples >LO<br>Q (n=195)<br>Range: <LOQ –<br>154 $\mu$ g/L<br>(<LOQ– 123 $\mu$ g/g)<br>Median: 14.5 $\mu$ g/L<br>(12.5 $\mu$ g/g)<br>Pre-shift median:<br>9.9 $\mu$ g/L (8.10<br>$\mu$ g/g)<br>Post-shift median:<br>22.1 $\mu$ g/L (12.7<br>$\mu$ g/g) |                                                                                                                                                                                                                                                                                                          | Mycotoxins<br>detected<br>Samples<br>>LOQ<br>OTA, 76%<br>ZEN, 99%<br>$\alpha$ ZEL, 52%<br>$\beta$ ZEL, 33%<br>T-2, 4%<br>HT-2, 4% |
| Ndaw at<br>al.,<br>2021b<br>(France) | Grain elevator<br>Workers<br>(n=18) | DON<br>Aflatoxin B1<br>Ochratoxin A<br>T-2 toxin<br>HT-2 toxin<br>Fumonisin B1<br>Zearalenone |                                                                                                                                    | HR-<br>MS/MS<br><br>LOQ<br>DON 0.05 |                                                                                                                                                                                                                                                             |                                                                                                                                                                                                                                                                                                          |                                                                                                                                   |

<sup>a</sup> The lower the LaKind score the better the overall quality (possible range 9–27).

<sup>1</sup> De-epoxy DON; <sup>2</sup> dihydrocitrinone; <sup>3</sup>  $\alpha$ - and  $\beta$ -zearalenol; <sup>4</sup> alternariol, alternariol–monomethyl ether, altenuene; <sup>5</sup> ochratoxin A, 2'R ochratoxin A, 10 hydroxyochratoxin A, ochratoxin  $\alpha$ ; <sup>6</sup> HT-2-4-glucuronic acid; <sup>7</sup> zearalenone, zearalanone, zearalenol-14-glucuronic acid.

## B – Appraisal Persson et al. (2012)

## QUALITY ASSESSMENT TOOL FOR QUANTITATIVE STUDIES

### COMPONENT RATINGS

#### A) SELECTION BIAS

(Q1) Are the individuals selected to participate in the study likely to be representative of the target population?

- 1 Very likely
- 2 Somewhat likely
- 3 Not likely
- 4 Can't tell

(Q2) What percentage of selected individuals agreed to participate?

- 1 80 - 100% agreement
- 2 60–79% agreement
- 3 less than 60% agreement
- 4 Not applicable
- 5 Can't tell

| RATE THIS SECTION | STRONG | MODERATE | WEAK |
|-------------------|--------|----------|------|
|                   | G      |          |      |
| See dictionary    | 1      | 2        | 3    |

#### B) STUDY DESIGN

Indicate the study design

- 1 Randomized controlled trial
- 2 Controlled clinical trial
- 3 Cohort analytic (two group pre + post)
- 4 Case-control
- 5 Cohort (one group pre + post (before and after))
- 6 Interrupted time series
- 7 Otherspecify \_\_\_\_\_
- 8 Can't tell

Was the study described as randomized? If NO, go to Component C.

N Yes

If Yes, was the method of randomization described? (See dictionary)

No Yes

If Yes, was the method appropriate? (See dictionary)

No Yes

| RATE THIS SECTION | STRONG | MODERATE | WEAK |
|-------------------|--------|----------|------|
|                   | G      |          |      |
| See dictionary    | 1      | 2        | 3    |

### c) CONFOUNDERS

(Q1) Were there important differences between groups prior to the intervention?

- 1 Yes ☐
- 2 No ☐
- 3 Can't tell ☐

The following are examples of confounders:

- 1 Race
- 2 Sex
- 3 Marital status/family
- 4 Age
- 5 SES (income or class)
- 6 Education
- 7 Health status
- 8 Pre-intervention score on outcome measure

(Q2) If yes, indicate the percentage of relevant confounders that were controlled (either in the design (e.g. stratification, matching) or analysis)?

- 1 80 – 100% (most)
- 2 60 – 79% (some)
- 3 Less than 60% (few or none)
- 4 Can't Tell

| RATE THIS SECTION | STRONG | MODERATE | WEAK |
|-------------------|--------|----------|------|
|                   | G      |          |      |
| See dictionary    | 1      | 2        | 3    |

### d) BLINDING

(Q1) Was (were) the outcome assessor(s) aware of the intervention or exposure status of participants?

- 1 Yes ☐
- 2 No ☐
- 3 Can't tell ☐

(Q2) Were the study participants aware of the research question?

- 1 Yes ☐
- 2 No ☐
- 3 Can't tell ☐

| RATE THIS SECTION | STRONG | MODERATE | WEAK |
|-------------------|--------|----------|------|
|                   |        | TE       | K    |
| See dictionary    | 1      | 2        | 3    |

### e) DATA COLLECTION METHODS

(Q1) Were data collection tools shown to be valid?

- 1 Yes ☐

- 2 No
- 3 Can't tell

(Q2) Were data collection tools shown to be reliable?

- 1 Yes
- 2 No
- 3 Can't tell

| RATE THIS SECTION | STRONG | MODERATE | WEAK |
|-------------------|--------|----------|------|
|                   | G      | TE       |      |
| See dictionary    | 1      | 2        | 3    |

## F) WITHDRAWALS AND DROP-OUTS

(Q1) Were withdrawals and drop-outs reported in terms of numbers and/or reasons per group?

- 1 Yes
- 2 No
- 3 Can't tell
- 4 Not Applicable (i.e. one time surveys or interviews)

(Q2) Indicate the percentage of participants completing the study. (If the percentage differs by groups, record the lowest).

- 1 80 -100%
- 2 60 - 79%
- 3 less than 60%
- 4 Can't tell
- 5 Not Applicable (i.e. Retrospective case-control)

| RATE THIS SECTION | STRONG | MODERATE | WEAK           |
|-------------------|--------|----------|----------------|
|                   | G      | TE       | K              |
| See dictionary    | 1      | 2        | 3              |
|                   |        |          | Not Applicable |

## G) INTERVENTION INTEGRITY

(Q1) What percentage of participants received the allocated intervention or exposure of interest?

- 1 80 -100%
- 2 60 - 79%
- 3 less than 60%
- 4 Can't tell

(Q2) Was the consistency of the intervention measured?

- 1 Yes
- 2 No
- 3 Can't tell

(Q3) Is it likely that subjects received an unintended intervention (contamination or co-intervention) that may influence the results?

- 4 Yes
- 5 No
- 6 Can't tell

## H) ANALYSES

(Q1) Indicate the unit of allocation (circle one)

community organization/institution practice/office **individual**

**(Q2) Indicate the unit of analysis (circle one)**

community organization/institution practice/office

individu

**(Q3) Are the statistical methods appropriate for the study design?**

- 1 Yes
- 2 No
- 3 Can't tell

**(Q4) Is the analysis performed by intervention allocation status (i.e. intention to treat) rather than the actual intervention received?**

- 1 Yes
- 2 No
- 3 Can't tell

**GLOBAL RATING****COMPONENT RATINGS**

Please transcribe the information from the gray boxes on pages 1-4 onto this page. See dictionary on how to rate this section.

|          |                                 |               |                 |                |
|----------|---------------------------------|---------------|-----------------|----------------|
| <b>A</b> | <b>SELECTION BIAS</b>           | <b>STRONG</b> | <b>MODERATE</b> | <b>WEAK</b>    |
|          |                                 | 1             | 2               | 3              |
| <b>B</b> | <b>STUDY DESIGN</b>             | <b>STRONG</b> | <b>MODERATE</b> | <b>WEAK</b>    |
|          |                                 | 1             | 2               | 3              |
| <b>C</b> | <b>CONFOUNDERS</b>              | <b>STRONG</b> | <b>MODERATE</b> | <b>WEAK</b>    |
|          |                                 | 1             | 2               | 3              |
| <b>D</b> | <b>BLINDING</b>                 | <b>STRONG</b> | <b>MODERATE</b> | <b>WEAK</b>    |
|          |                                 | 1             | 2               | 3              |
| <b>E</b> | <b>DATA COLLECTION METHOD</b>   | <b>STRONG</b> | <b>MODERATE</b> | <b>WEAK</b>    |
|          |                                 | 1             | 2               | 3              |
| <b>F</b> | <b>WITHDRAWALS AND DROPOUTS</b> | <b>STRONG</b> | <b>MODERATE</b> | <b>WEAK</b>    |
|          |                                 | 1             | 2               | 3              |
|          |                                 |               |                 | Not Applicable |

**GLOBAL RATING FOR THIS PAPER (circle one):**

- 1 **STRONG** (no WEAK ratings)
- 2 **MODERATE** (one WEAK rating)
- 3 **WEAK** (two or more WEAK ratings)

With both reviewers discussing the ratings:

Is there a discrepancy between the two reviewers with respect to the component (A-F) ratings?

No Yes

If yes, indicate the reason for the discrepancy

- 1 Oversight
- 2 Differences in interpretation of criteria
- 3 Differences in interpretation of study

**Final decision of both reviewers (circle one):**

|   |          |
|---|----------|
| 1 | STRONG   |
| 2 | MODERATE |
| 3 | WEAK     |



## C – Appraisal Missmer et al. (2006)

# QUALITY ASSESSMENT TOOL I

## QUANTITATIVE STUDIES

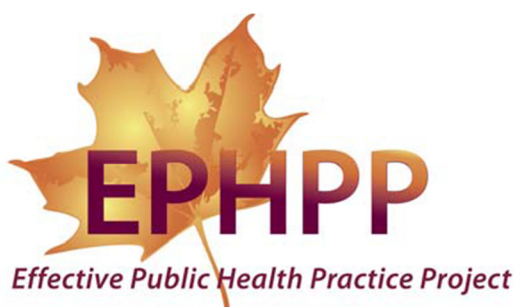

## COMPONENT RATINGS

## A) SELECTION BIAS

(Q1) Are the individuals selected to participate in the study likely to be representative of the target population?

- 1 Very likely
- 2 Somewhat likely
- 3 Not likely
- 4 Can't tell

(Q2) What percentage of selected individuals agreed to participate?

- 1 80 - 100% agreement
- 2 60–79% agreement
- 3 less than 60% agreement
- 4 Not applicable
- 5 Can't tell

| RATE THIS SECTION | STRONG | MODERA<br>TE | WEA<br>K |
|-------------------|--------|--------------|----------|
| See dictionary    | 1      | 2            | 3        |

## B) STUDY DESIGN

Indicate the study design

- 1 Randomized controlled trial
- 2 Controlled clinical trial
- 3 Cohort analytic (two group pre + post)
- 4 Case-control
- 5 Cohort (one group pre + post (before and after))
- 6 Interrupted time series
- 7 Otherspecify \_\_\_\_\_
- 8 Can't tell

Was the study described as randomized? If NO, go to Component C.

N Yes

If Yes, was the method of randomization described? (See dictionary)

No Yes

If Yes, was the method appropriate? (See dictionary)

No Yes

| RATE THIS SECTION | STRON | MODERATE | WEAK |
|-------------------|-------|----------|------|
|                   | G     |          |      |
| See dictionary    | 1     | 2        | 3    |

### c) CONFOUNDERS

(Q1) Were there important differences between groups prior to the intervention?

- 1 Yes
- 2 No
- 3 Can't tell

The following are examples of confounders:

- 1 Race
- 2 Sex
- 3 Marital status/family
- 4 Age
- 5 SES (income or class)
- 6 Education
- 7 Health status
- 8 Pre-intervention score on outcome measure

(Q2) If yes, indicate the percentage of relevant confounders that were controlled (either in the design (e.g. stratification, matching) or analysis)?

- 1 80 – 100% (most)
- 2 60 – 79% (some)
- 3 Less than 60% (few or none)
- 4 Can't Tell

| RATE THIS SECTION | STRON | MODERATE | WEAK |
|-------------------|-------|----------|------|
|                   | G     |          |      |
| See dictionary    | 1     | 2        | 3    |

### D) BLINDING

(Q1) Was (were) the outcome assessor(s) aware of the intervention or exposure status of participants?

- 1 Yes
- 2 No
- 3 Can't tell

(Q2) Were the study participants aware of the research question?

- 1 Yes
- 2 No
- 3 Can't tell

| RATE THIS SECTION | STRON | MODERATE | WEAK |
|-------------------|-------|----------|------|
|                   | G     |          |      |
| See dictionary    | 1     | 2        | 3    |

### E) DATA COLLECTION METHODS

(Q1) Were data collection tools shown to be valid?

- 1 Yes

- 2 No
- 3 Can't tell

(Q2) Were data collection tools shown to be reliable?

- 1 Yes
- 2 No
- 3 Can't tell

| RATE THIS SECTION | STRONG | MODERATE | WEAK |
|-------------------|--------|----------|------|
|                   | G      | TE       |      |
| See dictionary    | 1      | 2        | 3    |

## F) WITHDRAWALS AND DROP-OUTS

(Q1) Were withdrawals and drop-outs reported in terms of numbers and/or reasons per group?

- 1 Yes
- 2 No
- 3 Can't tell
- 4 Not Applicable (i.e. one time surveys or interviews)

(Q2) Indicate the percentage of participants completing the study. (If the percentage differs by groups, record the lowest).

- 1 80 -100%
- 2 60 - 79%
- 3 less than 60%
- 4 Can't tell
- 5 Not Applicable (i.e. Retrospective case-control)

| RATE THIS SECTION | STRONG | MODERATE | WEAK           |
|-------------------|--------|----------|----------------|
|                   | G      | TE       | K              |
| See dictionary    | 1      | 2        | 3              |
|                   |        |          | Not Applicable |

## G) INTERVENTION INTEGRITY

(Q1) What percentage of participants received the allocated intervention or exposure of interest?

- 1 80 -100%
- 2 60 - 79%
- 3 less than 60%
- 4 Can't tell

(Q2) Was the consistency of the intervention measured?

- 1 Yes
- 2 No
- 3 Can't tell

(Q3) Is it likely that subjects received an unintended intervention (contamination or co-intervention) that may influence the results?

- 4 Yes
- 5 No
- 6 Can't tell

## H) ANALYSES

(Q1) Indicate the unit of allocation (circle one)

community organization/institution practice/office **individual**

**(Q2) Indicate the unit of analysis (circle one)**

community organization/institution practice/office

individu

**(Q3) Are the statistical methods appropriate for the study design?**

- 1 Yes
- 2 No
- 3 Can't tell

**(Q4) Is the analysis performed by intervention allocation status (i.e. intention to treat) rather than the actual intervention received?**

- 1 Yes
- 2 No
- 3 Can't tell

**GLOBAL RATING****COMPONENT RATINGS**

Please transcribe the information from the gray boxes on pages 1-4 onto this page. See dictionary on how to rate this section.

|          |                                       |               |                 |                |
|----------|---------------------------------------|---------------|-----------------|----------------|
| <b>A</b> | <b>SELECTION BIAS</b>                 | <b>STRONG</b> | <b>MODERATE</b> | <b>WEAK</b>    |
|          |                                       | 1             | 2               | 3              |
| <b>B</b> | <b>STUDY DESIGN</b>                   | <b>STRONG</b> | <b>MODERATE</b> | <b>WEAK</b>    |
|          |                                       | 1             | 2               | 3              |
| <b>C</b> | <b>CONFOUNDERS</b>                    | <b>STRONG</b> | <b>MODERATE</b> | <b>WEAK</b>    |
|          |                                       | 1             | 2               | 3              |
| <b>D</b> | <b>BLINDING</b>                       | <b>STRONG</b> | <b>MODERATE</b> | <b>WEAK</b>    |
|          |                                       | 1             | 2               | 3              |
| <b>E</b> | <b>DATA<br/>COLLECTION<br/>METHOD</b> | <b>STRONG</b> | <b>MODERATE</b> | <b>WEAK</b>    |
|          |                                       | 1             | 2               | 3              |
| <b>F</b> | <b>WITHDRAWALS<br/>AND DROPOUTS</b>   | <b>STRONG</b> | <b>MODERATE</b> | <b>WEAK</b>    |
|          |                                       | 1             | 2               | 3              |
|          |                                       |               |                 | Not Applicable |

**GLOBAL RATING FOR THIS PAPER (circle one):**

- 1 **STRONG** (no WEAK ratings)
- 2 **MODERATE** (one WEAK rating)
- 3 **WEAK** (two or more WEAK ratings)

With both reviewers discussing the ratings:

Is there a discrepancy between the two reviewers with respect to the component (A-F) ratings?

No Yes

If yes, indicate the reason for the discrepancy

- 1 Oversight
- 2 Differences in interpretation of criteria
- 3 Differences in interpretation of study

**Final decision of both reviewers (circle one):**

|   |          |
|---|----------|
| 1 | STRONG   |
| 2 | MODERATE |
| 3 | WEAK     |

## D – EMBASE search string for DON

#25 #8 NOT [animals]/lim 298

#24 #23 NOT #10 NOT #18 31

#23 #22 AND [2016-2020]/py 443

#22 #21 AND english:la 1,052

#21 #11 AND #20 1,085

#20 #19 OR #13 22,871,744

#19 [humans]/lim 21,993,373

#18 #17 NOT #10 52

#17 #16 AND [2016-2020]/py 290

#16 #15 AND english:la 741

#15 #11 AND #14 760

#14 #12 OR #13 4,432,012

#13 'human':ti,ab OR 'urin\*':ti,ab OR 'cohort':ti,ab 4,432,012

#12 'human[lim]' 43

#11 'vomitoxin'/exp OR 'vomitoxin\*':ti OR 'deoxynivalenol'/exp/mj OR 'deoxynivalenol\*':ti 3,472

#10 #8 NOT #9 378

#9 'in vitro' 2,196,997

#8 #7 AND [2016-2020]/py 465

#7 #6 AND english:la 1,163

#6 #1 AND #5 1,196

#5 #2 OR #4 23,170,518

#4 'human':ti,ab OR 'urin\*':ti,ab OR 'cohort':ti,ab 4,432,012

#3 #1 AND #2 1,146

#2 'human' 22,962,843

#1 'vomitoxin'/exp OR vomitoxin OR 'deoxynivalenol'/exp/mj OR 'deoxynivalenol':ti 3,494

## E – EMBASE search string for FB1

Embase search

#5 #3 NOT #4 729

#4 'arabidopsis':ti,ab 60,878

#3 #1 AND #2 752

#2 'fumonisin' 3,858

#1 'sphingolipid' OR 'sphingolipid metabolism' OR 'sphingosine' OR 'sphinganine' 28,019

Embase search for other ceramide synthase inhibitors

#3 #1 AND #2 88

#2 'ceramide synthase' OR 'sphingosine n-acyltransferase' OR 'sphinganine n-acyltransferase' 1,013

#1 'fty720'/exp OR 'fty720' OR 'fingolimod'/exp OR 'fingolimod' OR 'gilenya'/exp

OR 'gilenya' OR 'myriocin'/exp OR 'myriocin' OR 'australifuncin\*' OR 'aal toxin\*' 10,979

Embase search for AAL

#3 #1 AND #2 18

#2 'aal toxin' 50

#1 'sphingosine' OR 'sphinganine' OR 'ceramide synthase' OR 'sphingolipid metabolism' 19,279
